# Supplementary material for: Polyoxometalate charge directed coordination assemblies: Macrocycles and polymer chains
Source: Royal Society of Chemistry journal article supplement (doi:10.1039/c0ce00761g), 2011-01-01
Supplement: c0ce00761g.pdf [file c0ce00761g.pdf]

Supporting Information

Polyoxometalate Charge Directed Coordination Assemblies: Macrocycles and Polymer Chains

*Guangfeng Hou, Lihua Bi, Bao Li, Bin Wang, and Lixin Wu\**

State Key Laboratory of Supramolecular Structure and Materials, College of Chemistry, Jilin  
University, Changchun 130012, China

\*To whom correspondence should be addressed. Tel.: (86)431-8516-8481. Fax:  
(86)431-8519-3421. E-mail: [wulx@jlu.edu.cn](mailto:wulx@jlu.edu.cn).

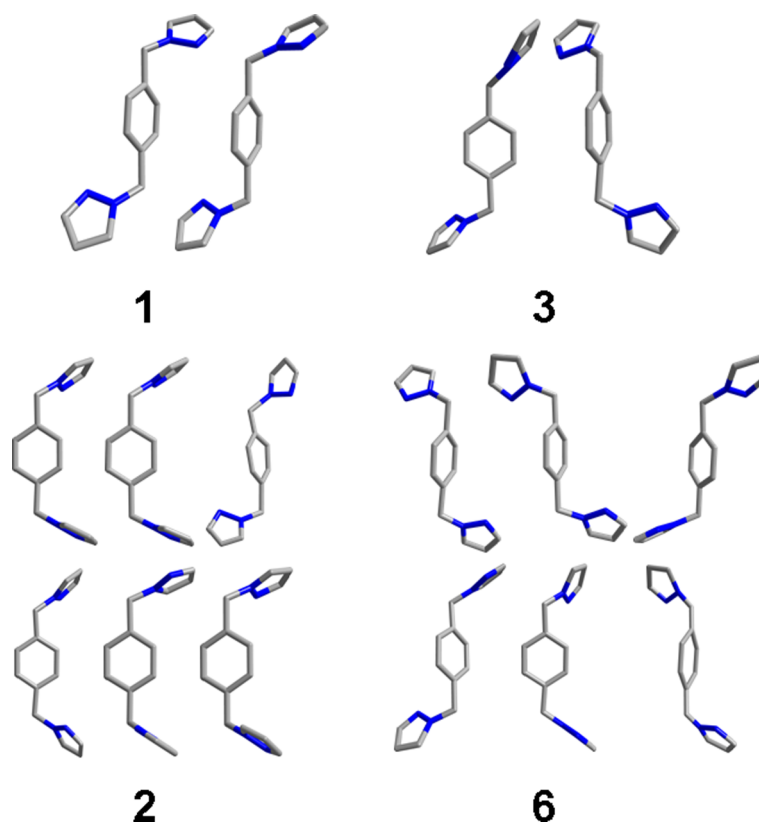

**Figure S1** Conformations of the L molecules.

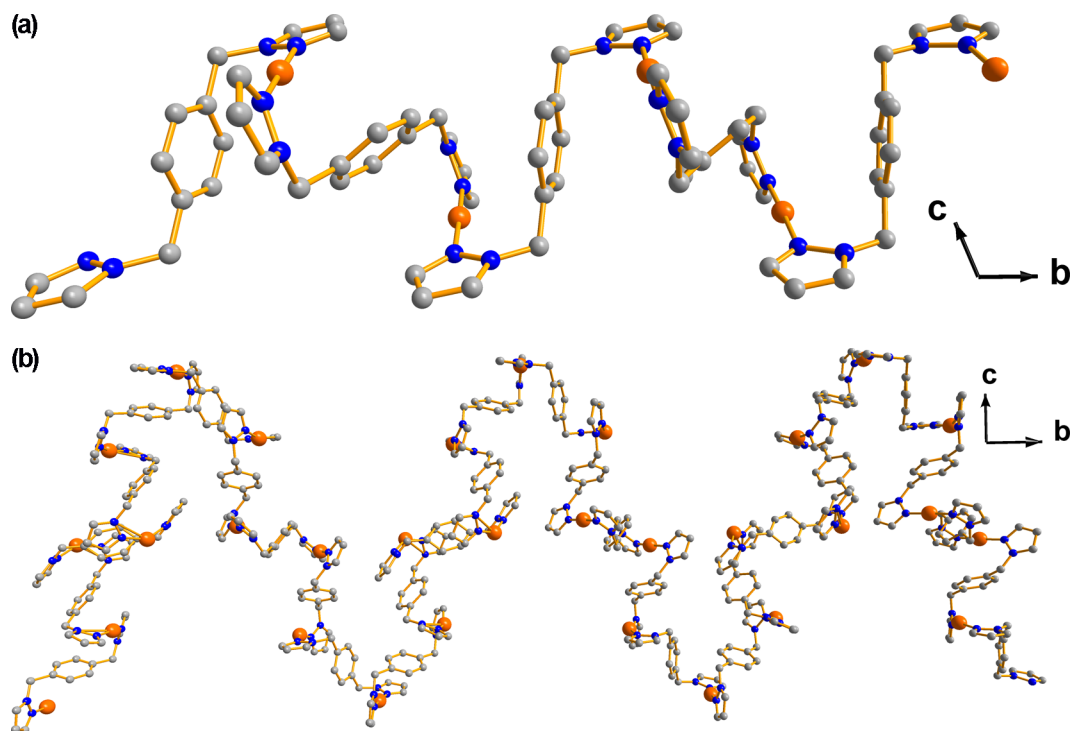

**Figure S2** 1D cationic chains in **1** and **6**.

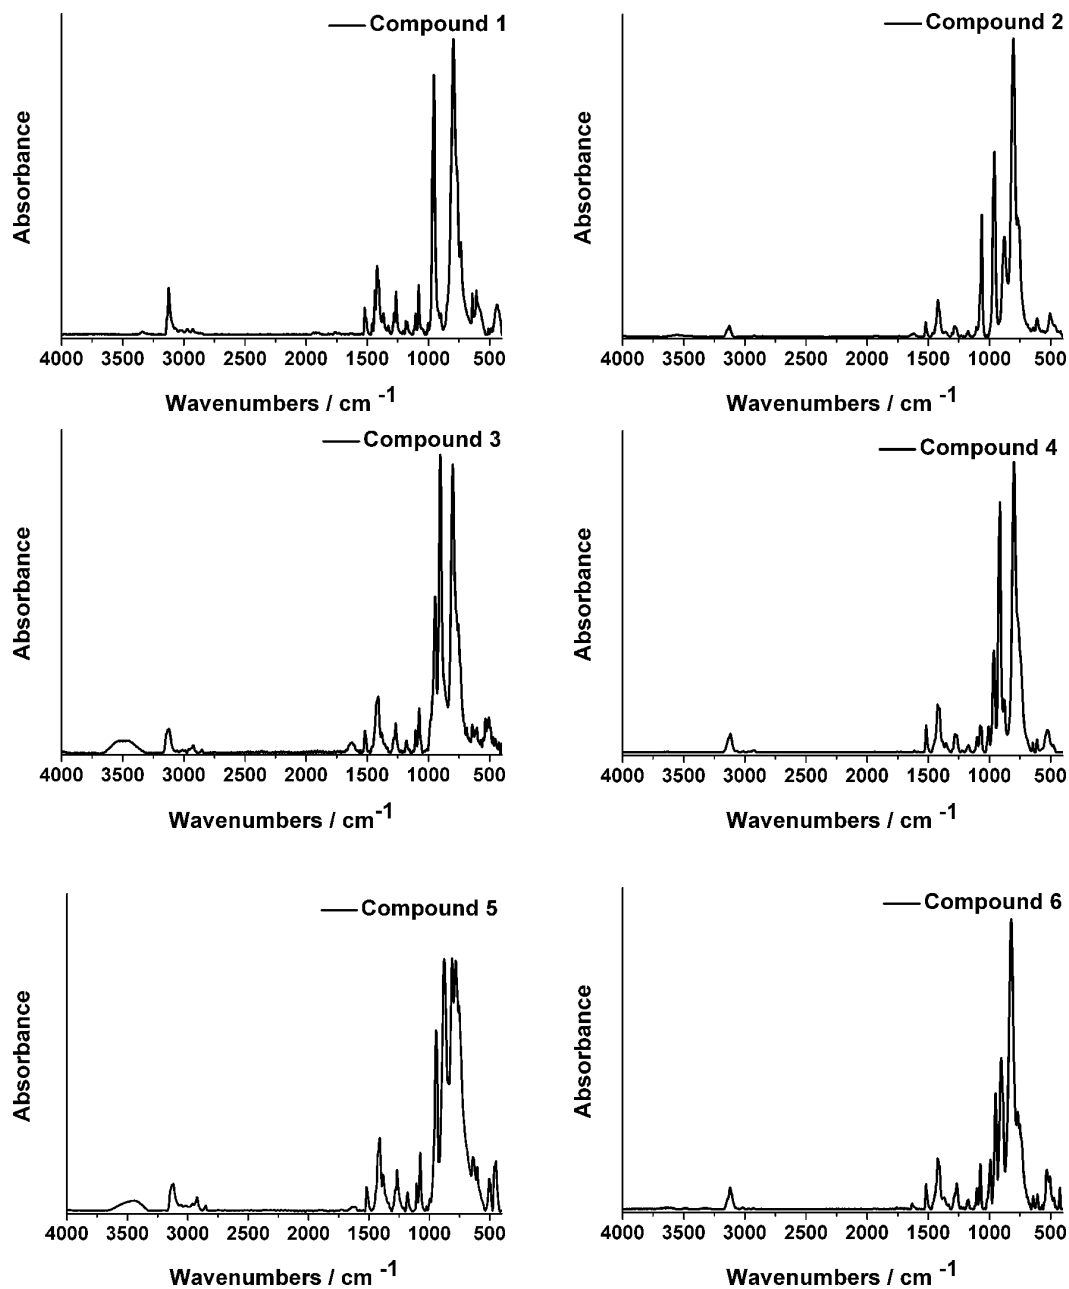

Figure S3 The IR spectra of compounds 1–6.

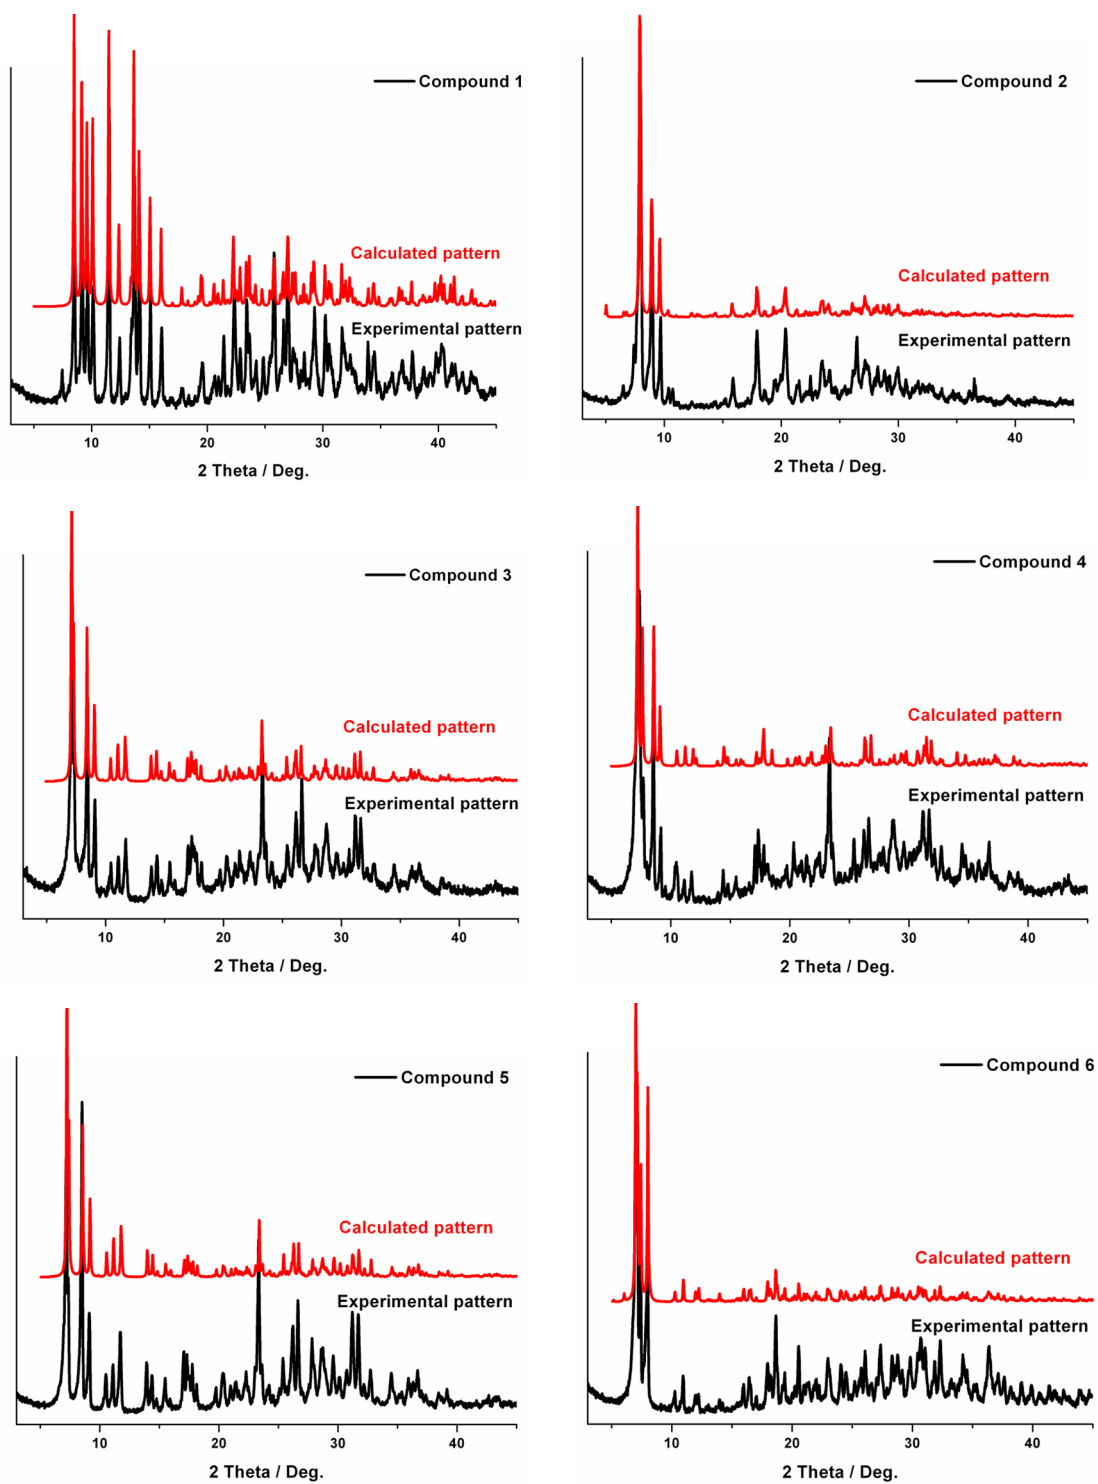

**Figure S4** The powder X-ray diffraction patterns and the simulated patterns of compounds 1–6.

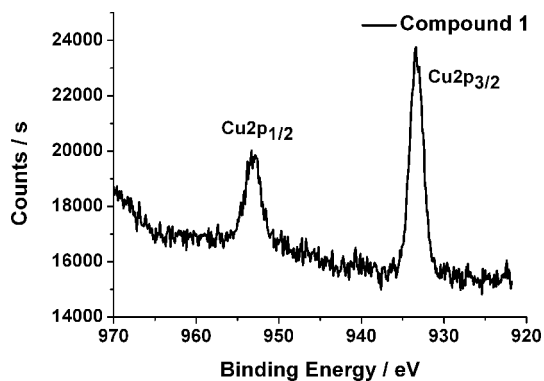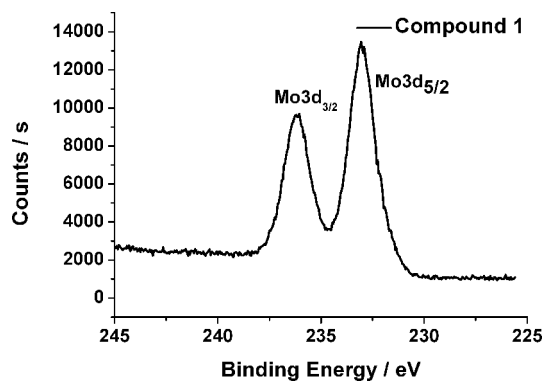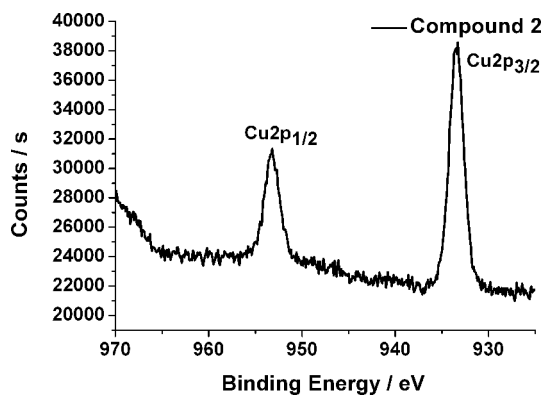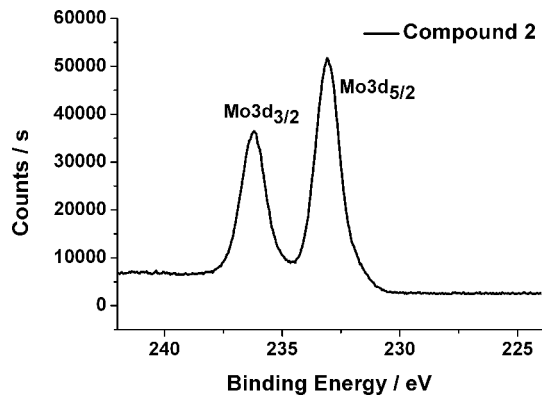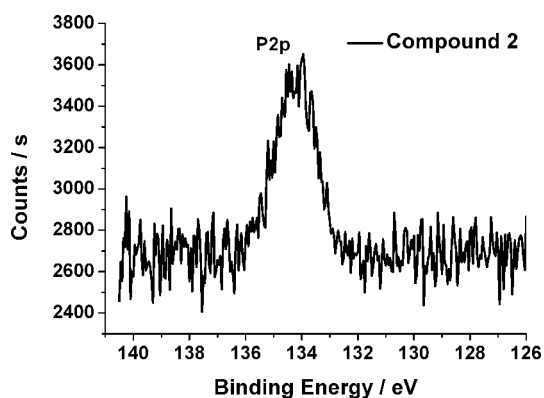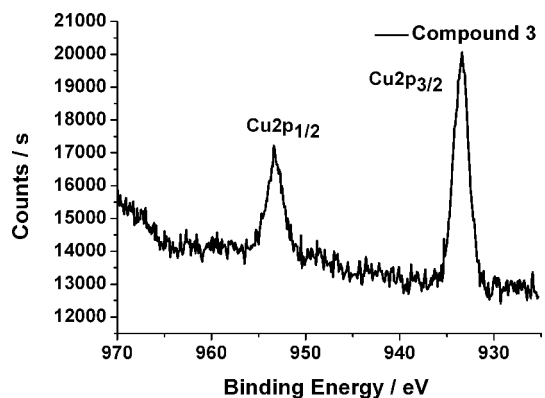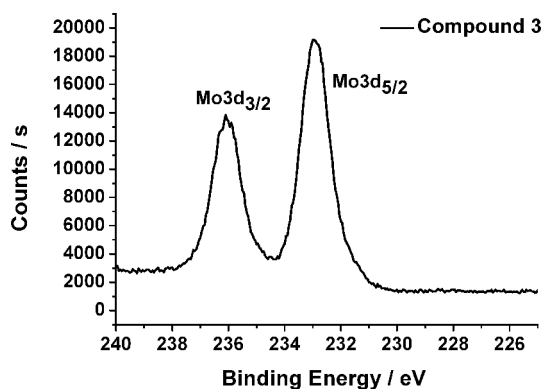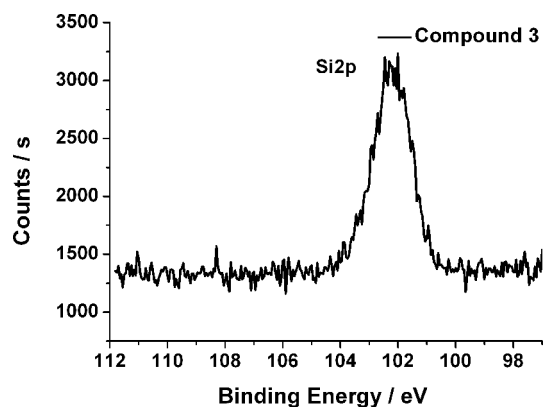

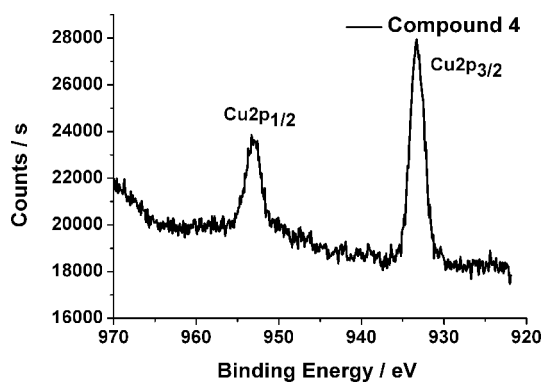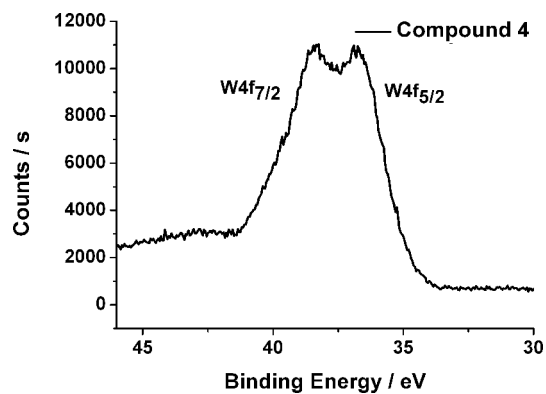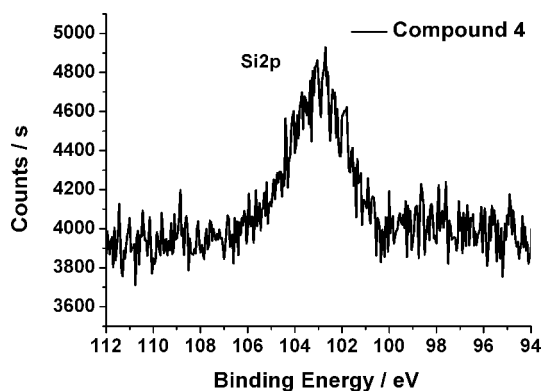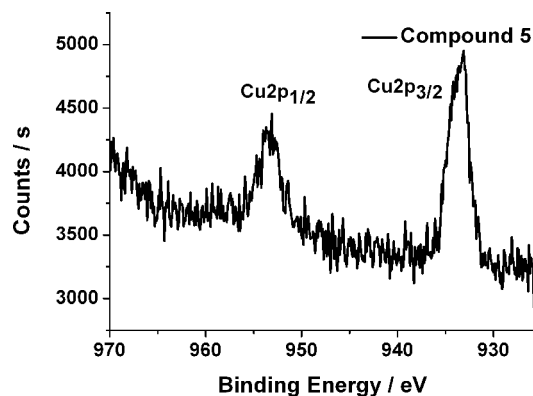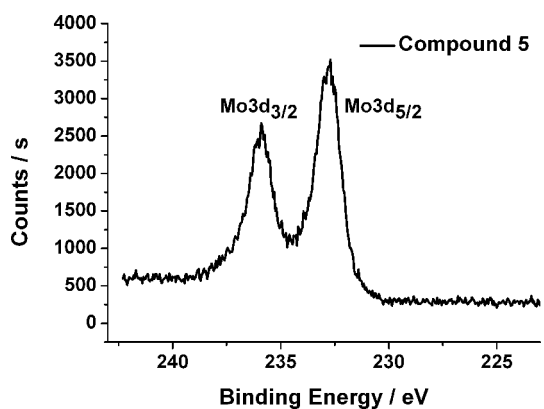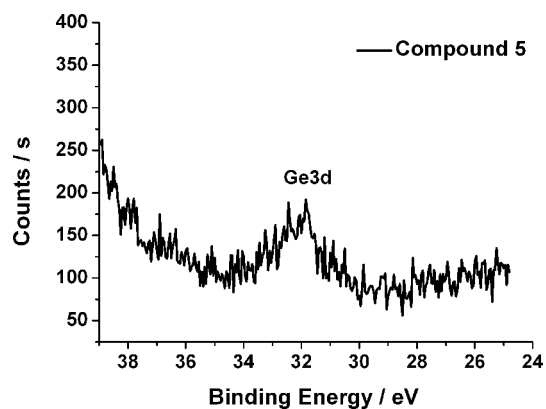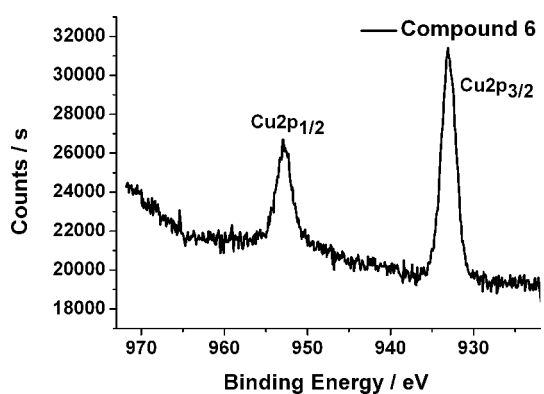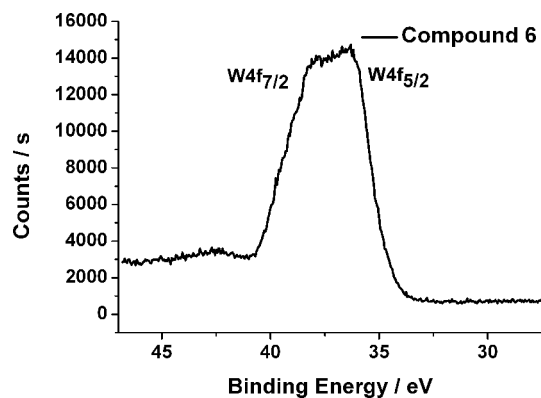

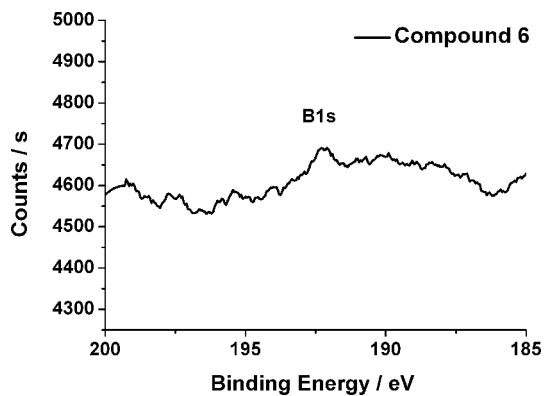

Figure S5 X-ray photoelectron spectra of compounds 1–6

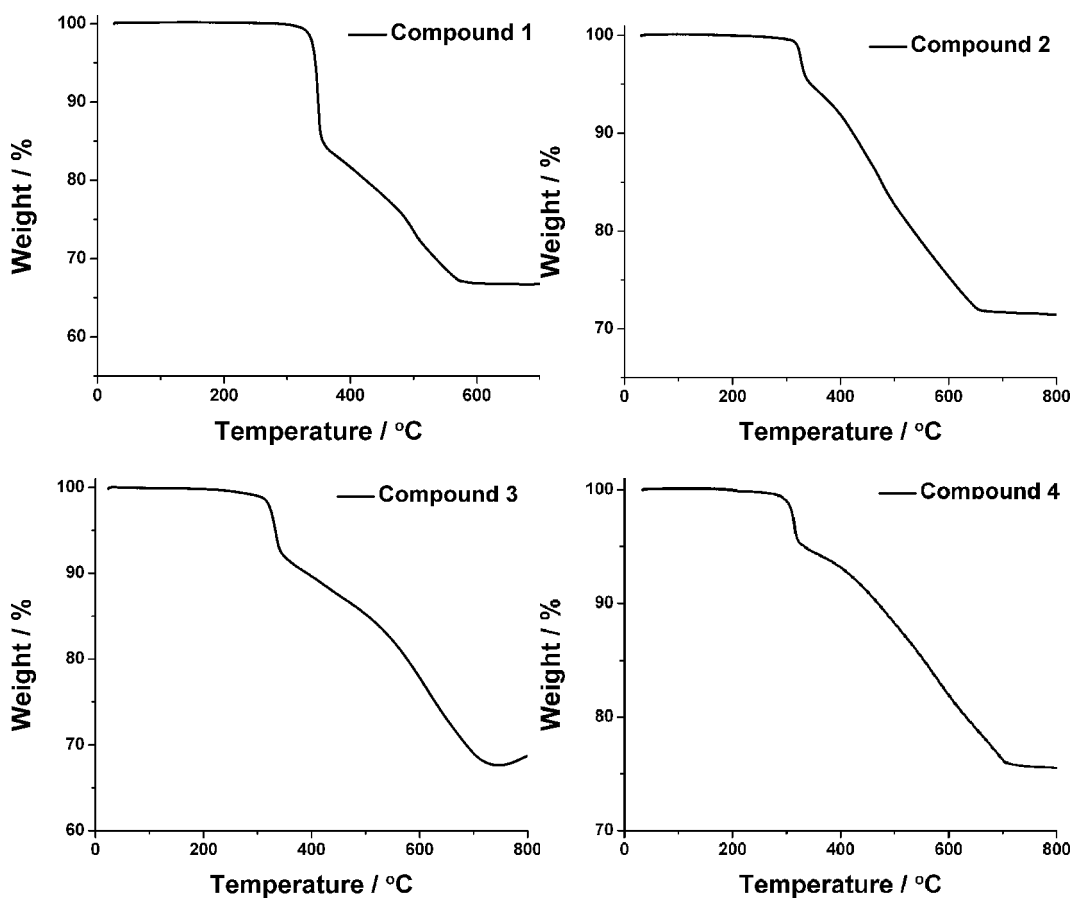

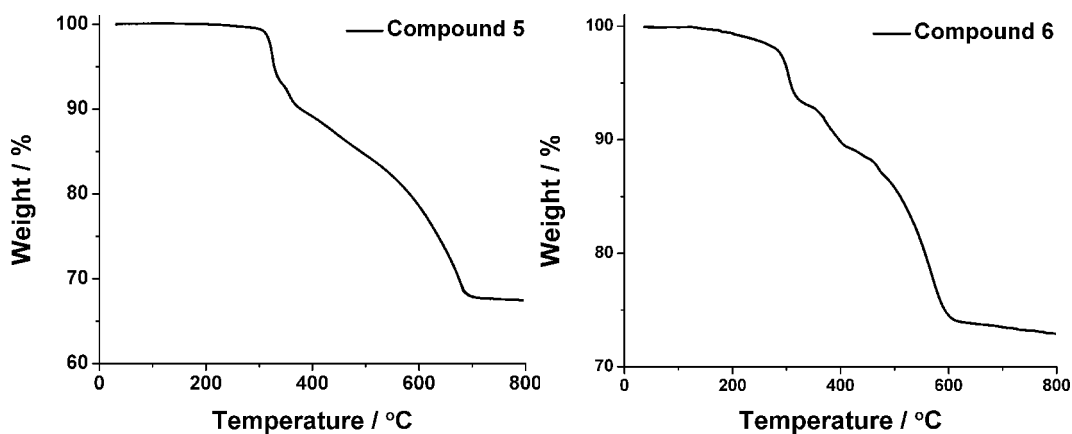

Figure S6 TGA curves of compounds 1–6.

Table S1 TGA of compounds 1–6.

| Compound | Formula                                  | Stable temperature<br>/ °C | Lost weight range<br>/ °C | Lost weight % |        |
|----------|------------------------------------------|----------------------------|---------------------------|---------------|--------|
|          |                                          |                            |                           | Exp.          | Calcd. |
| 1        | $C_{28}H_{28}N_8Cu_2Mo_6O_{19}$          | 322                        | 322-585                   | 34.2          | 32.5   |
| 2        | $C_{84}H_{84}N_{24}Cu_6P_2Mo_{24}O_{80}$ | 313                        | 313-672                   | 27.4          | 26.2   |
| 3        | $C_{56}H_{56}N_{16}Cu_4SiMo_{12}O_{40}$  | 309                        | 309-720                   | 32.1          | 31.5   |
| 4        | $C_{56}H_{56}N_{16}Cu_4SiW_{12}O_{40}$   | 305                        | 305-706                   | 23.9          | 23.3   |
| 5        | $C_{56}H_{56}N_{16}Cu_4GeMo_{12}O_{40}$  | 306                        | 306-703                   | 31.9          | 31.1   |
| 6        | $C_{70}H_{72}N_{20}Cu_5BW_{12}O_{41}$    | 296                        | 296-614                   | 26.9          | 27.6   |



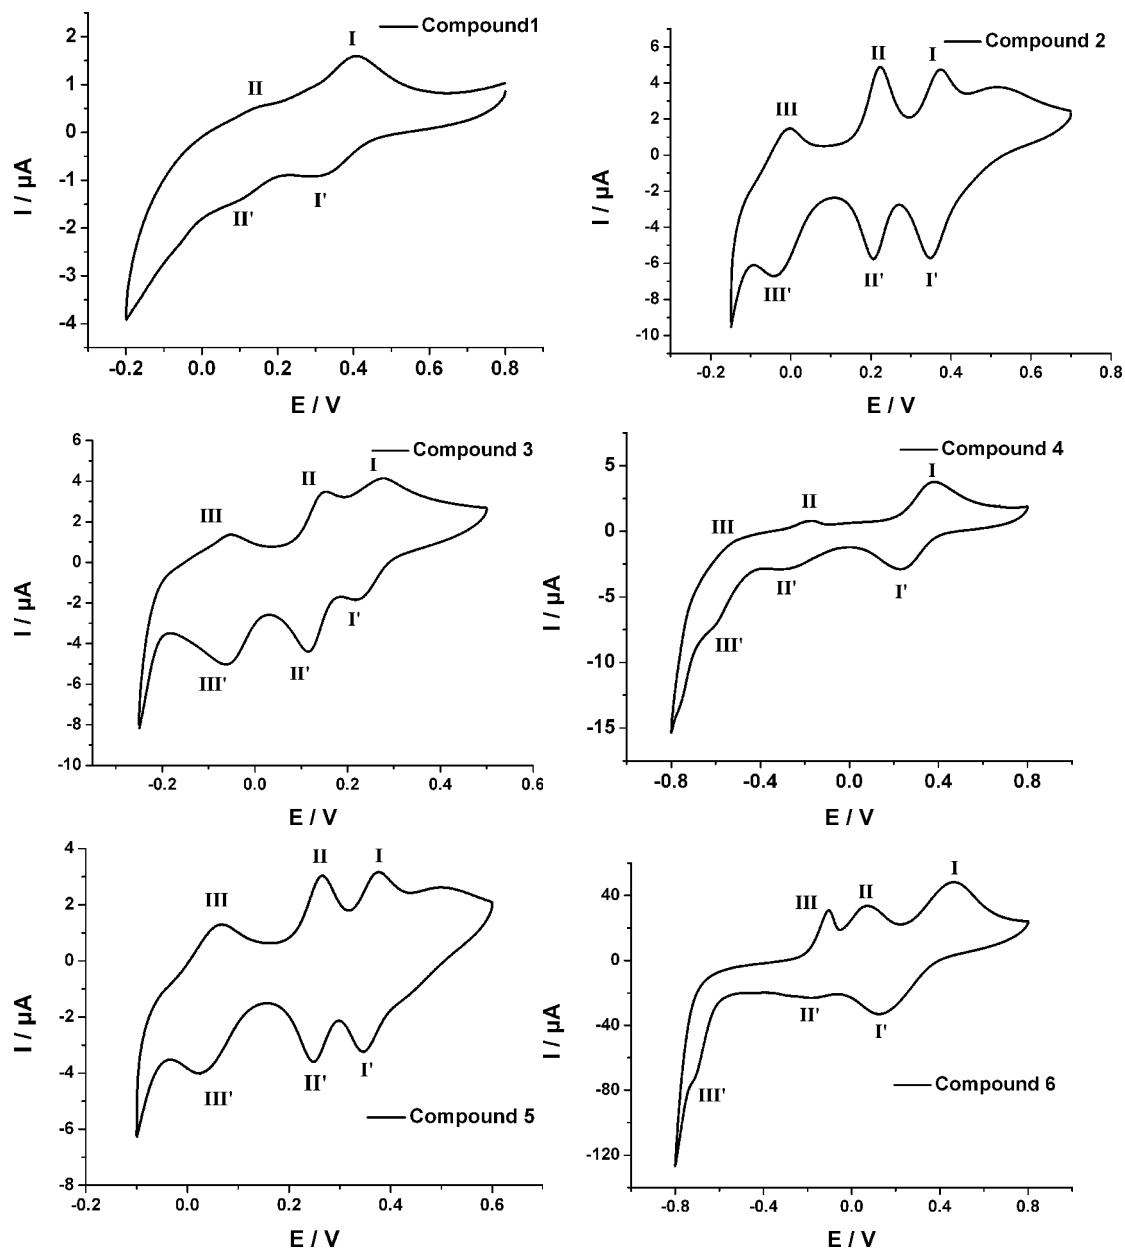

**Figure S7** The Cyclic voltammograms of 1-CPE, 3-CPE, 4-CPE and 6-CPE in 1M H<sub>2</sub>SO<sub>4</sub> under scan rate 50 mV·s<sup>-1</sup>.

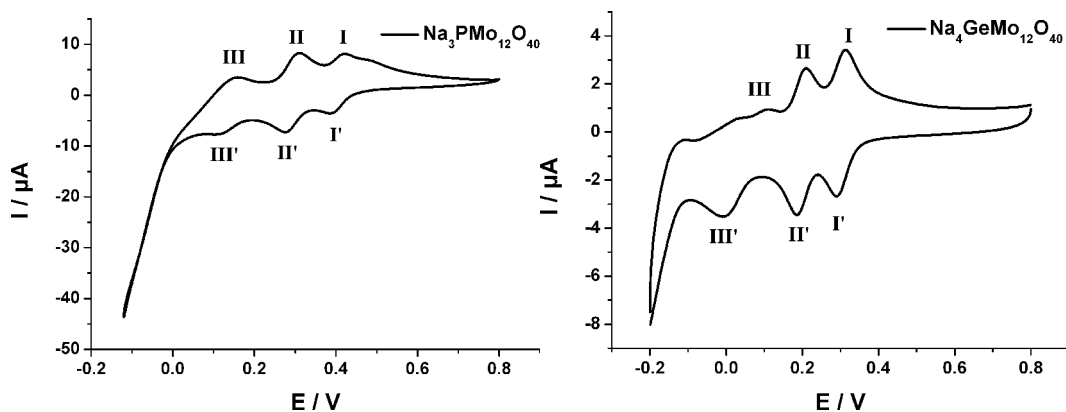

**Figure S8** The cyclic voltammograms of  $[\text{PMo}_{12}\text{O}_{40}]^{3-}$  and  $[\text{GeMo}_{12}\text{O}_{40}]^{4-}$ -CPE in 1 M  $\text{H}_2\text{SO}_4$  under scan rate  $50 \text{ mV}\cdot\text{s}^{-1}$ .

Some special restraints are used during the refinement of 2–6: In 2, a total of 27 restraints are caused by the commands 'Dfix 1.50 0.01 C36 C39 N10 C32 N12 C39' and 'Isor 0.01 N12 N10 C35 C40' to restrain the bond distance and thermal ellipsoid. In 3, a total of 36 restraints are caused by the commands 'Isor 0.01 O6 O7 O9 O13 O14 O16' to restrain the thermal ellipsoid. In 4, a total of 96 restraints are caused by the commands 'Isor 0.001 O19 O21 and Isor 0.01 C12 O20 N7 C13 O2 O4 O6 O7 O9 O11 O12 O13 O14 O16' to restrain the thermal ellipsoid. In 5, a total of 30 restraints are caused by the commands 'Isor 0.01 O11 O13 and Isor 0.005 O7 O14 O16' to restrain the thermal ellipsoid. In 6, a total of 2 restraints are caused by the commands 'DFIX 1.40 0.01 C68 C69 C68 C70'.

**Table S2:** Selected Bond Lengths and Angles for Compounds 1–6.

| Compound 1      |            |                 |           |
|-----------------|------------|-----------------|-----------|
| Cu(1)–N(3)      | 1.877(4)   | Cu(1)–N(1)      | 1.880(4)  |
| Cu(1)–O(9)      | 2.579(4)   |                 |           |
| N(3)–Cu(1)–N(1) | 178.54(18) | N(3)–Cu(1)–O(9) | 94.55(15) |
| N(1)–Cu(1)–O(9) | 84.05(16)  |                 |           |
| Compound 2      |            |                 |           |
| Cu(1)–N(11)     | 1.837(8)   | Cu(1)–N(1)      | 1.850(7)  |
| Cu(2)–N(3)      | 1.854(9)   | Cu(2)–N(5)      | 1.870(9)  |
| Cu(3)–N(7)      | 1.845(8)   | Cu(3)–N(9)      | 1.851(9)  |
| Cu(4)–N(13)     | 1.839(8)   | Cu(4)–N(23)     | 1.849(7)  |
| Cu(5)–N(19)     | 1.873(8)   | Cu(5)–N(21)     | 1.876(8)  |
| Cu(6)–N(15)     | 1.842(8)   | Cu(6)–N(17)     | 1.850(7)  |

|                                 |           |                   |           |
|---------------------------------|-----------|-------------------|-----------|
| Cu(4)–O(40)                     | 2.785(7)  | P(1)–O(3)         | 1.545(5)  |
| P(1)–O(13)                      | 1.525(5)  | P(1)–O(16)        | 1.534(5)  |
| P(1)–O(21)                      | 1.527(6)  | P(2)–O(44)        | 1.527(5)  |
| P(2)–O(46)                      | 1.532(5)  | P(2)–O(47)        | 1.532(5)  |
| P(2)–O(54)                      | 1.540(5)  |                   |           |
| N(11)–Cu(1)–N(1)                | 174.1(4)  | N(3)–Cu(2)–N(5)   | 177.2(4)  |
| N(7)–Cu(3)–N(9)                 | 175.6(4)  | N(13)–Cu(4)–N(23) | 179.5(4)  |
| N(19)–Cu(5)–N(21)               | 172.8(4)  | N(15)–Cu(6)–N(17) | 176.7(4)  |
| O(40)–Cu(4)–N(23)               | 88.2(3)   | O(40)–Cu(4)–N(13) | 91.7(3)   |
| <b>Compound 3</b>               |           |                   |           |
| Cu(1)–N(1)                      | 1.825(13) | Cu(2)–N(3)        | 1.872(12) |
| Cu(2)–N(5)                      | 1.878(11) | Cu(3)–N(7)        | 1.861(9)  |
| Si–O(19)                        | 1.673(13) | Si–O(20)          | 1.678(13) |
| Si–O(21)                        | 1.541(12) | Si–O(22)          | 1.603(12) |
| N(1)#1–Cu(1)–N(1)               | 166.4(9)  | N(3)–Cu(2)–N(5)   | 165.5(6)  |
| N(7)–Cu(3)–N(7)#1               | 174.8(6)  |                   |           |
| Symmetry Code: #1 -x, y, -z+1/2 |           |                   |           |
| <b>Compound 4</b>               |           |                   |           |
| Cu(1)–N(1)                      | 1.841(16) | Cu(2)–N(3)        | 1.861(17) |
| Cu(2)–N(5)                      | 1.879(15) | Cu(3)–N(7)        | 1.862(14) |
| Si–O(19)                        | 1.674(19) | Si–O(20)          | 1.63(2)   |
| Si–O(21)                        | 1.564(18) | Si–O(22)          | 1.557(19) |
| N(1)#1–Cu(1)–N(1)               | 169.0(12) | N(3)–Cu(2)–N(5)   | 164.3(9)  |
| N(7)–Cu(3)–N(7)#1               | 175.7(10) |                   |           |
| Symmetry Code: #1 -x, y, -z+1/2 |           |                   |           |
| <b>Compound 5</b>               |           |                   |           |
| Cu(1)–N(1)                      | 1.828(10) | Cu(2)–N(3)        | 1.849(12) |
| Cu(2)–N(5)                      | 1.860(10) | Cu(3)–N(7)        | 1.874(9)  |
| Ge(1)–O(19)                     | 1.802(12) | Ge(1)–O(20)       | 1.779(12) |
| Ge(1)–O(21)                     | 1.717(11) | Ge(1)–O(22)       | 1.627(12) |

|                                                                     |           |                     |           |
|---------------------------------------------------------------------|-----------|---------------------|-----------|
| N(1)–Cu(1)–N(1)#1                                                   | 168.4(7)  | N(3)–Cu(2)–N(5)     | 165.1(6)  |
| N(7)#1–Cu(3)–N(7)                                                   | 174.8(6)  |                     |           |
| Symmetry Code: #1 -x, y, -z+1/2                                     |           |                     |           |
| <b>Compound 6</b>                                                   |           |                     |           |
| Cu(1)–N(1)                                                          | 1.891(11) | Cu(1)–N(7)          | 1.906(11) |
| Cu(1)–O(34)                                                         | 2.205(8)  | Cu(2)–N(3)          | 1.883(14) |
| Cu(2)–N(5)                                                          | 1.914(13) | Cu(3)–N(9)          | 1.860(12) |
| Cu(3)–N(11)                                                         | 1.878(11) | Cu(3)–O(37)#3       | 2.776(9)  |
| Cu(4)–N(15)                                                         | 1.891(15) | Cu(4)–N(20)         | 1.969(14) |
| Cu(4)–O(15)                                                         | 2.195(8)  | Cu(5)–N(14)#2       | 1.886(13) |
| Cu(5)–N(17)#1                                                       | 1.905(12) | Cu(5)–O(10)         | 2.429(9)  |
| B(1)–O(26)                                                          | 1.515(17) | B(1)–O(27)          | 1.520(17) |
| B(1)–O(9)                                                           | 1.547(17) | B(1)–O(21)          | 1.547(16) |
| N(1)–Cu(1)–N(7)                                                     | 150.7(5)  | N(1)–Cu(1)–O(34)    | 112.4(4)  |
| N(7)–Cu(1)–O(34)                                                    | 92.8(4)   | N(3)–Cu(2)–N(5)     | 172.5(7)  |
| N(9)–Cu(3)–N(11)                                                    | 171.7(5)  | N(9)–Cu(3)–O(37)#3  | 91.4(4)   |
| N(11)–Cu(3)–O(37)#3                                                 | 91.1(4)   | N(15)–Cu(4)–N(20)   | 145.0(7)  |
| N(15)–Cu(4)–O(15)                                                   | 107.6(5)  | N(20)–Cu(4)–O(15)   | 107.3(5)  |
| N(14)#2–Cu(5)–N(17)#1                                               | 162.7(5)  | N(14)#2–Cu(5)–O(10) | 101.4(4)  |
| N(17)#1–Cu(5)–O(10)                                                 | 94.8(4)   |                     |           |
| Symmetry Code: #1 -x+2, -y, -z+2; #2 x, y-1, z; #3 -x-1, -y-1, -z-1 |           |                     |           |

**Table S3.** Selected Hydrogen Bond Interactions in Compounds 1–6.

| <b>Compound 1</b>                                                                                                         |        |          |          |              |
|---------------------------------------------------------------------------------------------------------------------------|--------|----------|----------|--------------|
| D–H···A                                                                                                                   | D–H/ Å | H···A/ Å | D···A/ Å | ∠D–H···A/deg |
| C(3)–H(3)···O(4)#4                                                                                                        | 0.93   | 2.47     | 3.259(6) | 142          |
| C(10)–H(10)···O(1)#5                                                                                                      | 0.93   | 2.31     | 3.237(6) | 178          |
| C(13)–H(13)···O(6)#6                                                                                                      | 0.93   | 2.40     | 3.283(6) | 159          |
| Symmetry Code: #1 -x, -y+1, -z+1; #2 -x, -y, -z+1; #3 -x+1, -y+2, -z+2; #4 -x+1, -y+1, -z+1; #5 x-1, y-1, z; #6 x, y-1, z |        |          |          |              |

| Compound 2                                                           |        |          |           |                |
|----------------------------------------------------------------------|--------|----------|-----------|----------------|
| D–H...A                                                              | D–H/ Å | H...A/ Å | D...A/ Å  | ∠D – H...A/deg |
| C(1)–H(1)···O(49)#1                                                  | 0.93   | 2.58     | 3.315(11) | 137            |
| C(4)–H(4B)···O(51)                                                   | 0.97   | 2.52     | 3.307(11) | 138            |
| C(9)–H(9)···O(74)#7                                                  | 0.93   | 2.56     | 3.387(11) | 148            |
| C(11)–H(11A)···O(74)#7                                               | 0.97   | 2.36     | 3.261(11) | 155            |
| C(12)–H(12)···O(1)                                                   | 0.93   | 2.58     | 3.083(12) | 114            |
| C(18)–H(18A)···O(70)#7                                               | 0.97   | 2.53     | 3.467(11) | 163            |
| C(25)–H(25B)···O(58)#6                                               | 0.97   | 2.46     | 3.331(12) | 149            |
| C(28)–H(28)···O(43)#2                                                | 0.93   | 2.56     | 3.281(15) | 135            |
| C(32)–H(32A)···O(56)#2                                               | 0.97   | 2.68     | 3.583(16) | 154            |
| C(32)–H(32B)···O(26)                                                 | 0.97   | 2.30     | 3.224(16) | 160            |
| C(40)–H(40)···O(23)#5                                                | 0.93   | 2.53     | 3.417(17) | 158            |
| C(45)–H(45)···O(67)#1                                                | 0.93   | 2.38     | 3.311(13) | 179            |
| C(48)–H(48)···O(38)#1                                                | 0.93   | 2.59     | 3.490(12) | 162            |
| C(53)–H(53B)···O(79)#2                                               | 0.97   | 2.49     | 3.353(12) | 148            |
| C(57)–H(57)···O(36)#1                                                | 0.93   | 2.53     | 3.182(12) | 128            |
| C(58)–H(58)···O(71)#1                                                | 0.93   | 2.55     | 3.426(12) | 157            |
| C(59)–H(59)···O(43)#1                                                | 0.93   | 2.42     | 3.138(12) | 134            |
| C(60)–H(60A)···O(7)#4                                                | 0.97   | 2.60     | 3.556(13) | 168            |
| C(67)–H(67A)···O(2)#3                                                | 0.97   | 2.26     | 3.215(10) | 169            |
| C(73)–H(73)···O(74)#2                                                | 0.93   | 2.54     | 3.292(11) | 138            |
| C(81)–H(81A)···O(28)                                                 | 0.97   | 2.55     | 3.172(12) | 122            |
| C(81)–H(81A)···O(37)                                                 | 0.97   | 2.59     | 3.549(13) | 168            |
| C(82)–H(82)···O(49)#2                                                | 0.93   | 2.35     | 3.131(12) | 142            |
| C(83)–H(83)···O(60)#2                                                | 0.93   | 2.38     | 3.277(12) | 162            |
| C(84)–H(84)···O(39)#1                                                | 0.93   | 2.45     | 3.166(12) | 134            |
| Symmetry Code: #1 x-1,-y+1/2,z-1/2 #2 -x+1,-y,-z+1 #3 x,-y+1/2,z-1/2 |        |          |           |                |
| #4 x-1,y,z-1 #5 -x+1,y-1/2,-z+3/2 #6 x-1,y,z #7 -x+2,-y,-z+2         |        |          |           |                |
| Compound 3                                                           |        |          |           |                |

|                                                                                                                    |      |      |           |     |
|--------------------------------------------------------------------------------------------------------------------|------|------|-----------|-----|
| C(4)–H(4A)···O(11)                                                                                                 | 0.97 | 2.47 | 3.30(2)   | 144 |
| C(10)–H(10)···O(1)#2                                                                                               | 0.93 | 2.60 | 3.42(2)   | 148 |
| C(11)–H(11B)···O(16)#3                                                                                             | 0.97 | 2.38 | 3.20(2)   | 142 |
| C(15)–H(15)···O(2)#2                                                                                               | 0.93 | 2.52 | 3.241(16) | 135 |
| C(17)–H(17)···O(7)#4                                                                                               | 0.93 | 2.49 | 3.376(19) | 160 |
| C(18)–H(18B)···O(6)#4                                                                                              | 0.97 | 2.55 | 3.44(2)   | 152 |
| C(20)–H(20)···O(2)#5                                                                                               | 0.93 | 2.59 | 3.470(17) | 159 |
| C(26)–H(26)···O(13)#3                                                                                              | 0.93 | 2.53 | 3.275(15) | 137 |
| Symmetry Code: #1 -x, y, -z+1/2 #2 -x+1/2, -y+1/2, -z+1 #3 -x+1/2, y+1/2, -z+1/2<br>#4 -x, -y+1, -z+1 #5 x, y+1, z |      |      |           |     |
| <b>Compound 4</b>                                                                                                  |      |      |           |     |
| C(4)–H(4A)···O(11)                                                                                                 | 0.97 | 2.45 | 3.29(3)   | 144 |
| C(10)–H(10)···O(1)#2                                                                                               | 0.93 | 2.57 | 3.39(3)   | 149 |
| C(11)–H(11A)···O(16)#3                                                                                             | 0.97 | 2.49 | 3.30(3)   | 141 |
| C(15)–H(15)···O(2)#2                                                                                               | 0.93 | 2.52 | 3.22(2)   | 132 |
| C(17)–H(17)···O(7)#4                                                                                               | 0.93 | 2.50 | 3.39(3)   | 159 |
| C(18)–H(18B)···O(6)#4                                                                                              | 0.97 | 2.57 | 3.46(3)   | 151 |
| C(20)–H(20)···O(2) #5                                                                                              | 0.93 | 2.56 | 3.47(2)   | 164 |
| C(26)–H(26)···O(13)#3                                                                                              | 0.93 | 2.57 | 3.31(2)   | 137 |
| Symmetry Code: #1 -x,y,-z+1/2 #2 -x+1/2,-y+1/2,-z+1 #3 -x+1/2,y+1/2,-z+1/2<br>#4 -x,-y+1,-z+1 #5 x,y+1,z           |      |      |           |     |
| <b>Compound 5</b>                                                                                                  |      |      |           |     |
| C(4)–H(4A)···O(11)                                                                                                 | 0.97 | 2.47 | 3.294(19) | 143 |
| C(10)–H(10)···O(1)#2                                                                                               | 0.93 | 2.62 | 3.434(19) | 147 |
| C(11)–H(11A)···O(16)#3                                                                                             | 0.97 | 2.42 | 3.25(2)   | 143 |
| C(15)–H(15)···O(2)#2                                                                                               | 0.93 | 2.52 | 3.253(15) | 136 |
| C(17)–H(17)···O(7)#4                                                                                               | 0.93 | 2.50 | 3.392(18) | 162 |
| C(18)–H(18B)···O(6)#4                                                                                              | 0.97 | 2.60 | 3.48(2)   | 151 |
| C(20)–H(20)···O(2)#5                                                                                               | 0.93 | 2.62 | 3.497(15) | 157 |
| C(26)–H(26)···O(13)#3                                                                                              | 0.93 | 2.53 | 3.278(14) | 138 |
| Symmetry Code: #1 -x,y,-z+1/2 #2 -x+1/2,-y+1/2,-z+1 #3 -x+1/2,y+1/2,-z+1/2<br>#4 -x,-y+1,-z+1 #5 x,y+1,z           |      |      |           |     |

| Compound 6                                                                                                                                                                                         |      |      |           |     |
|----------------------------------------------------------------------------------------------------------------------------------------------------------------------------------------------------|------|------|-----------|-----|
| C(3)-H(3)...O(1)#5                                                                                                                                                                                 | 0.93 | 2.47 | 3.143(15) | 129 |
| C(14)-H(14)...O(6)#2                                                                                                                                                                               | 0.93 | 2.49 | 3.060(18) | 120 |
| C(14)-H(14)...O(14)#2                                                                                                                                                                              | 0.93 | 2.55 | 3.446(18) | 163 |
| C(16)-H(16)...O(28)#5                                                                                                                                                                              | 0.93 | 2.59 | 3.138(19) | 118 |
| C(18)-H(18B)...O(31)#2                                                                                                                                                                             | 0.97 | 2.55 | 3.41(2)   | 149 |
| C(21)-H(21)...O(31)#2                                                                                                                                                                              | 0.93 | 2.46 | 3.245(19) | 143 |
| C(24)-H(24)...O(2)#6                                                                                                                                                                               | 0.93 | 2.41 | 3.327(18) | 170 |
| C(28)-H(28)...O(36)#7                                                                                                                                                                              | 0.93 | 2.53 | 3.42(2)   | 160 |
| C(32)-H(32A)...O(17)#7                                                                                                                                                                             | 0.97 | 2.58 | 3.369(18) | 138 |
| C(33)-H(33)...O(40)#5                                                                                                                                                                              | 0.93 | 2.48 | 3.291(19) | 146 |
| O(41)-H(142)...O(29)                                                                                                                                                                               | 0.85 | 2.19 | 3.027(17) | 171 |
| O(41)-H(141)...O(28)                                                                                                                                                                               | 0.85 | 2.29 | 3.13(2)   | 173 |
| C(46)-H(46A)...O(41)#4                                                                                                                                                                             | 0.97 | 2.50 | 3.44(3)   | 165 |
| C(47)-H(47)...O(18)#5                                                                                                                                                                              | 0.93 | 2.44 | 3.34(3)   | 164 |
| C(61)-H(61)...O(3)#9                                                                                                                                                                               | 0.93 | 2.60 | 3.332(18) | 136 |
| C(61)-H(61)...O(11)#9                                                                                                                                                                              | 0.93 | 2.49 | 3.145(18) | 127 |
| C(63)-H(63)...O(29)#1                                                                                                                                                                              | 0.93 | 2.51 | 3.430(18) | 169 |
| C(66)-H(66)...O(30)#9                                                                                                                                                                              | 0.93 | 2.24 | 2.917(18) | 129 |
| C(66)-H(66)...O(38)#9                                                                                                                                                                              | 0.93 | 2.20 | 2.997(17) | 144 |
| C(67)-H(67A)...O(24)                                                                                                                                                                               | 0.97 | 2.24 | 3.10(2)   | 148 |
| Symmetry Code: #1 -x+2, -y, -z+2; #2 -x+2, -y+1, -z+2; #3 x, y-1, z; #4 x, y+1, z; #5 -x+1, y+1/2, -z+3/2; #6 -x+2, y+1/2, -z+3/2; #7 -x+1, -y+1, -z+1; #8 x+1, -y+1/2, z+1/2; #9 x, -y+1/2, z+1/2 |      |      |           |     |
